# Supplementary material
Source: HighWire-hosted journal article supplement (https://cmaj.ca/highwire/filestream/59543/field_highwire_adjunct_files/7/150901-res-5-at.pdf)
Supplement: 150901-res-5-at.pdf [file 150901-res-5-at.pdf]

## Appendix 5 (as supplied by the authors): Variables included in the propensity score

| Variables Included in the Propensity Score |                                             |
|--------------------------------------------|---------------------------------------------|
| Demographics                               | Age                                         |
|                                            | Sex                                         |
|                                            | Neighbourhood income quintile               |
|                                            | Index date                                  |
|                                            | Rural residence                             |
|                                            | Long-term care                              |
|                                            | Local Health Integration Network            |
| Comorbidities                              | Dementia                                    |
|                                            | Schizophrenia or related psychotic disorder |
|                                            | Bipolar disorder                            |
|                                            | Unipolar depression and/or anxiety disorder |
|                                            | Haemorrhagic stroke                         |
|                                            | Ischemic stroke                             |
|                                            | Transient ischemic attack                   |
|                                            | Chronic liver disease                       |
|                                            | Chronic kidney disease                      |
|                                            | Congestive heart failure                    |
|                                            | Coronary artery disease                     |
|                                            | Angina                                      |
|                                            | Peripheral vascular disease                 |
|                                            | Parkinson's disease                         |
|                                            | Chronic lung disease                        |
|                                            | Atrial fibrillation/flutter                 |
|                                            | Cancer                                      |
|                                            | Alcoholism                                  |
|                                            | Seizure                                     |
|                                            | Acute kidney injury                         |
|                                            | Acute myocardial infarction                 |
|                                            | Pacemaker                                   |
|                                            | Hyperkalemia                                |
|                                            | Hypotension                                 |
| Prostatic hyperplasia                      |                                             |
| Prostatitis                                |                                             |
| Acute urinary retention                    |                                             |
| Deep vein thrombosis/Pulmonary embolism    |                                             |
| Charlson comorbidity index                 |                                             |
| Johns Hopkins Aggregated Diagnosis Groups  |                                             |
| Medications                                | Antiarrhythmic                              |
|                                            | Antipsychotic                               |
|                                            | Proton pump inhibitor                       |
|                                            | Antiemetic                                  |
|                                            | Lithium                                     |
|                                            | Antilipemic                                 |
|                                            | Antihypertensive                            |
|                                            | Potassium sparing diuretic                  |
|                                            | Histamine H2 receptor antagonist            |
|                                            | Prokinetic                                  |
| QT-prolonging                              |                                             |

|                                                           |                                                                                                                                                                                                                                                                                                                                                                                                                                                                                                                                                                                                                                                                                                                                                                                                      |
|-----------------------------------------------------------|------------------------------------------------------------------------------------------------------------------------------------------------------------------------------------------------------------------------------------------------------------------------------------------------------------------------------------------------------------------------------------------------------------------------------------------------------------------------------------------------------------------------------------------------------------------------------------------------------------------------------------------------------------------------------------------------------------------------------------------------------------------------------------------------------|
|                                                           | <ul style="list-style-type: none"> <li>Antidiabetic</li> <li>Acetylsalicylic acid</li> <li>Anticoagulant (excludes warfarin)</li> <li>Antiplatelet</li> <li>Tricyclic antidepressant</li> <li>Opioid</li> <li>Antimalarian</li> <li>Antiviral</li> </ul>                                                                                                                                                                                                                                                                                                                                                                                                                                                                                                                                             |
| Medications                                               | <ul style="list-style-type: none"> <li>Antineoplastic</li> <li>Benzodiazepine</li> <li>Non-steroidal anti-inflammatory drug (excludes acetylsalicylic acid)</li> <li>Anticonvulsant</li> <li>Angiotensin-converting enzyme inhibitor or angiotensin II receptor blocker</li> <li>Beta-adrenergic antagonist</li> <li>Calcium channel blocker</li> <li>Non-potassium sparing diuretic</li> <li>Statin</li> <li>Antiparkinson drug</li> <li>Digoxin</li> <li>Overactive bladder medication</li> <li>Warfarin</li> <li>Inhaler - acetylcholine</li> <li>Inhaler - corticosteroid</li> <li>Inhaler - beta-agonist</li> <li>Smoking cessation aid</li> </ul>                                                                                                                                              |
| Health Care Use                                           | <ul style="list-style-type: none"> <li>Number of any hospitalizations</li> <li>Number of any emergency room visits</li> <li>General practice/Family practice visit</li> <li>Nephrology visit</li> <li>Cardiology visit</li> </ul>                                                                                                                                                                                                                                                                                                                                                                                                                                                                                                                                                                    |
| Investigations (a surrogate marker of health care access) | <ul style="list-style-type: none"> <li>Carotid ultrasound</li> <li>Cardiac catheterization</li> <li>Coronary angiogram</li> <li>Echocardiography</li> <li>Electroencephalography</li> <li>Holter monitoring</li> <li>Cardiac stress test</li> <li>Coronary revascularization</li> <li>Electrocardiography</li> <li>Colorectal cancer screening</li> <li>Cervical cancer screening</li> <li>Prostate-specific antigen test</li> <li>Mammography</li> <li>Influenza vaccination</li> <li>Bone mineral density test</li> <li>Hearing test</li> <li>Cystoscopy</li> <li>Transurethral resection of the prostate</li> <li>Computed tomography of the head</li> <li>Computed tomography of other areas</li> <li>Chest x-ray</li> <li>Pulmonary function test</li> <li>At-home physician service</li> </ul> |

|       |                                       |
|-------|---------------------------------------|
|       | Urinalysis                            |
|       | Sputum                                |
| Other | Prescriber specialty                  |
|       | Number of medications (polypharmacy)  |
|       | Baseline serum creatinine measurement |
